# Supplementary material
Source: PubMed Central journal article supplement (PMC7440773)
Supplement: NIHMS1610865-supplement-Supplemental_Material.pdf [file NIHMS1610865-supplement-Supplemental_Material.pdf]

## SUPPLEMENTAL MATERIAL

### **Predictive Value of Coronary Artery Calcium Score Categories for Coronary Events versus Strokes: Impact of Sex and Race** The Multi-Ethnic Study of Atherosclerosis (MESA) and Dallas Heart Study (DHS)

Anurag Mehta, MD<sup>a</sup>; Ambarish Pandey, MD MSCS<sup>b</sup>; Colby R. Ayers, MS<sup>c</sup>; Amit Khera, MD MSc<sup>b</sup>; Laurence S. Sperling, MD<sup>a</sup>; Moyses S. Szklo, MD DrPH<sup>d</sup>; Rebecca F. Gottesman, MD PhD<sup>e</sup>; Mathew J. Budoff, MD<sup>f</sup>; Michael J. Blaha MD MPH<sup>g</sup>; Roger S. Blumenthal, MD<sup>g</sup>; Khurram Nasir, MD MPH<sup>g,h</sup>; and Parag H. Joshi, MD, MHS<sup>b</sup>

<sup>a</sup> Emory Clinical Cardiovascular Research Institute, Division of Cardiology, Department of Medicine, Emory University School of Medicine, Atlanta, GA

<sup>b</sup> Division of Cardiology, Department of Internal Medicine, University of Texas Southwestern Medical Center, Dallas, TX

<sup>c</sup> Department of Clinical Sciences, University of Texas Southwestern Medical Center, Dallas, TX

<sup>d</sup> Department of Epidemiology, Johns Hopkins Bloomberg School of Public Health, Baltimore, MD

<sup>e</sup> Department of Neurology, Johns Hopkins University School of Medicine, Baltimore, MD

<sup>f</sup> Lundquist Institute at Harbor–University of California Los Angeles Medical Center, Torrance, CA

<sup>g</sup> Johns Hopkins Ciccarone Center for Prevention of Cardiovascular Disease, Baltimore, MD

<sup>h</sup> Center for Outcomes Research, Houston Methodist Hospital, Houston, TX

## **Cardiovascular risk factors**

The MESA study enrolled 6,814 participants and the DHS enrolled 2,971 participants. In MESA and DHS information about age, sex, race/ethnicity, smoking, medical history, and medication use was obtained using questionnaires.(1, 2) In MESA, diabetes was defined as a fasting glucose  $\geq 126$ mg/dL or hypoglycemic medication use and in DHS as a fasting glucose  $\geq 126$ mg/dL, a non-fasting blood glucose level  $\geq 200$  mg/dL, or hypoglycemic medication use.(2, 3) MESA participants had resting blood pressure measured three times in the seated position using a Dinamap model Pro 100 automated oscillometric sphygmomanometer (Critikon, Tampa, Florida), and the average of the second and third readings was recorded.(2) In DHS, five blood pressure measurements were taken in the seated position using a Series #52,000 oscillometric device (Welch Allyn, Inc., Arden, North Carolina) and their average was recorded.(1) Hypertension was defined similarly in both studies as a systolic blood pressure  $\geq 140$ mmHg, or diastolic blood pressure  $\geq 90$ mmHg, or antihypertensive medication use. For both MESA and DHS participants, total and high-density lipoprotein cholesterol (HDL-C) and triglyceride levels were measured from blood samples obtained after an overnight fast and low-density lipoprotein cholesterol (LDL-C) levels were calculated with the Friedewald equation.(1, 2) Family history of myocardial infarction (FHx) in first-degree relatives was ascertained using self-report in both studies.(4, 5)

### **Coronary artery calcium scanning procedures**

Three of the six MESA field centers used an electron-beam CT (EBCT) scanner (Chicago, Los Angeles, and New York) and the remaining three (Baltimore, Forsyth County, and St. Paul) used a multidetector CT (MDCT) scanner as previously described.(6)

Radiographic phantoms containing identical and known concentrations of calcium were placed beneath the thorax of each participant and certified technologists then scanned each participant two times. A radiologist or cardiologist read CT scans at a single center (Los Angeles Biomedical Research Institute at Harbor–University of California Los Angeles Medical Center, Torrance, California). CAC score was calculated for each scan using the Agatston method and the mean of the two scans was used in analyses. Intraobserver and interobserver agreement was excellent (kappa statistics, 0.93 and 0.90, respectively). (6) In DHS, an EBCT scanner was utilized and was prospectively gated to the electrocardiogram to acquire image slices of the heart during a single inspiratory breath-hold as previously described.(7) Duplicate CT scans were performed while the subject remained supine and the two CAC scores obtained were averaged. EBCT and MDCT scans are known to have high concordance for CAC scores.(8)

**Definition of atherosclerotic cardiovascular disease events:**

ASCVD was defined as a composite of nonfatal MI, coronary death, nonfatal stroke or fatal stroke in this study. This definition was used for both cohorts. All nonfatal MI, coronary death, nonfatal and fatal stroke events were reviewed and adjudicated by members of the MESA mortality and morbidity review committee, and the DHS clinical endpoints committee, as mentioned previously. The criteria used by MESA and DHS are described below:

**1. Nonfatal MI:**

**1A. MESA.** The criteria for nonfatal MI was adapted from the Atherosclerosis Risk in Communities (ARIC) study and include information about chest pain, cardiac enzymes, and ECG changes. These criteria are described in Table 1 and the MESA algorithm to classify cardiac enzymes into abnormal, equivocal, and normal is described in Table 2. The tables are listed in the MESA clinical events manual of operations (<https://www.mesa-nhlbi.org/manuals.aspx>) in Section 4, Page 2 and 4, respectively.

**Table 1 – MESA diagnostic criteria for MI**

**A. Cardiac Pain Present**

**Cardiac Enzymes**

| <b>ECG Pattern *</b>                                                                | <b>Abnormal</b> | <b>Equivocal</b> | <b>Incomplete</b> | <b>Normal</b> |
|-------------------------------------------------------------------------------------|-----------------|------------------|-------------------|---------------|
| Evolution of Major Q-Wave                                                           | Definite MI     | Definite MI      | Definite MI       | Definite MI   |
| Evolution of ST <u>Elevation</u> with or without Q- wave<br>Or<br>New LBBB          | Definite MI     | Probable MI      | Probable MI       | No MI         |
| Evolution of ST-T Depression/inversion alone Or<br>Evolution of Minor Q-waves alone | Definite MI     | Probable MI      | No MI             | No MI         |
| Single ECG with Major Q-Wave Or<br>Single ECG with LBBB, described as new           | Definite MI     | Probable MI      | No MI             | No MI         |
| Normal, Absent, Uncodable, other                                                    | Probable MI     | No MI            | No MI             | No MI         |

## B. Cardiac Pain Absent

## Cardiac Enzymes

| ECG Pattern                                                                             | Abnormal    | Equivocal   | Incomplete or Missing | Normal      |
|-----------------------------------------------------------------------------------------|-------------|-------------|-----------------------|-------------|
| Evolution of Major Q-Wave                                                               | Definite MI | Definite MI | Definite MI           | Definite MI |
| Evolution of ST <u>Elevation</u> with or without Q- wave<br>Or<br>New LBBB              | Definite MI | Probable MI | No MI                 | No MI       |
| Evolution of ST-T <u>Depression</u> /inversion alone Or Evolution of Minor Q-Wave alone | Probable MI | No MI       | No MI                 | No MI       |
| Single ECG with Major Q-Wave Or<br>Single ECG with LBBB, described as new               | Probable MI | No MI       | No MI                 | No MI       |
| Normal, Absent, Uncodable, other                                                        | Probable MI | No MI       | No MI                 | No MI       |

**Table 2 – MESA diagnostic criteria for MI**

| Enzyme Value                                    | There is<br>(a) no known muscle trauma/ hemolysis and<br>(b) no PTCA or CABG in past 48 hours* | Muscle trauma/ liver/ hemolytic disease exists |
|-------------------------------------------------|------------------------------------------------------------------------------------------------|------------------------------------------------|
| CK-MB = present where present or absent         | Abnormal                                                                                       | Equivocal                                      |
| CK-MB $\geq$ 2x ULN (upper limit of normal)     | Abnormal                                                                                       | Equivocal                                      |
| CK-MB** $\geq$ 10% Total CK, if no ULN is given | Abnormal                                                                                       | Equivocal                                      |
| Total CK $\geq$ 2xULN<br>and LDH $\geq$ 2xULN   | Abnormal                                                                                       | Equivocal                                      |
| LDH1 : LDH2 > 1                                 | Abnormal                                                                                       | Equivocal                                      |

|                                                                      |            |            |
|----------------------------------------------------------------------|------------|------------|
| LDH1 $\geq$ 2x ULN if LDH2 is missing                                | Abnormal   | Equivocal  |
| Total CK $\geq$ 2x ULN <u>or</u> LDH $\geq$ 2x ULN                   | Equivocal  | Normal     |
| Normal < Total CK < 2x ULN <u>and</u> Normal < LDH < 2x ULN          | Equivocal  | Normal     |
| 5% Total CK < CK-MB** < 9% Total CK <u>or</u> CK-MB “weakly present” | Equivocal  | Equivocal  |
| Normal < CK-MB < 2x ULN                                              | Equivocal  | Equivocal  |
| Normal < LDH1 < 2x ULN                                               | Equivocal  | Equivocal  |
| Data present, but insufficient for above criteria                    | Incomplete | Incomplete |
| Normal < Troponins < 2x ULN                                          | Equivocal  | Equivocal  |
| Troponins > 2x ULN                                                   | Abnormal   | Abnormal   |
| Troponins < ULN                                                      | Normal     | Normal     |
| CK-MB < ULN                                                          | Normal     | Normal     |
| All other results                                                    | Normal     | Normal     |

\*PTCA—abnormal in first 48 hours requires Troponins or LDH1 or CK or CK-MB > 3x ULN; equivocal requires 1-3x ULN. CABG—abnormal in first 48 hours requires Troponins or LDH1 or CK-MB > 5x ULN; equivocal requires 1-5x ULN

\*\*CK and CK-MB must be in same units for this criterion.

**1B. DHS.** Nonfatal MI criteria are based upon chest pain, cardiac enzymes, and ECG changes as well. The criteria are summarized below:

**Criteria for MI (in the absence of revascularization procedure) include:**

- abnormal cardiac enzymes AND
- diagnostic chest pain OR

- ECG changes

**Criteria for Post percutaneous coronary intervention (PCI) MI include:**

- new pathologic Q waves on ECG OR
- cardiac enzymes within 24 hours of the procedure of  $\geq 3x$  upper limit of normal (ULN) and  $\geq 50\%$  above last measurement if last measure was  $\geq ULN$

**Criteria for Post CABG MI include:**

- new pathologic Q waves on ECG OR
- CK-MB within 24 hours of the procedure  $\geq 5x$  ULN and  $\geq 50\%$  above last measurement if last measure was  $\geq ULN$

|                                         |                                                                                                                                                                                                                                                                                                                                                                                                   |
|-----------------------------------------|---------------------------------------------------------------------------------------------------------------------------------------------------------------------------------------------------------------------------------------------------------------------------------------------------------------------------------------------------------------------------------------------------|
| CHEST PAIN                              | <b>(pain, dyspnea, pressure) at rest or accelerated ischemic symptoms, either of which lasts <math>\geq 10</math> minutes</b>                                                                                                                                                                                                                                                                     |
| ECG CRITERIA                            | ECG changes consistent with injury or ischemia: <ul style="list-style-type: none"> <li>- new significant Q waves (or R waves in V1-V2) in two contiguous leads in the absence of LVH or conduction abnormalities</li> <li>- ST segment or T wave abnormality consistent with ischemia or injury in two or more contiguous leads</li> <li>- development of new left bundle branch block</li> </ul> |
| ENZYME CRITERIA*<br>(CK-MB or Troponin) | Cardiac Enzymes Abnormal: <ul style="list-style-type: none"> <li>- Marker <math>\geq ULN</math></li> <li>and</li> <li><math>\geq 50\%</math> above last measurement if last measure was <math>\geq ULN</math></li> </ul>                                                                                                                                                                          |

**2. Coronary death:**

**2A. MESA.** Coronary death is defined as atherosclerotic coronary heart disease death that comprises of definite fatal MI, definite fatal CHD, and possible fatal CHD. This also requires the absence of known non-atherosclerotic or non-cardiac causes of death. The definitions for definite fatal MI, definite fatal CHD, and possible fatal CHD are listed below:

**Definite Fatal MI:**

- Any in-hospital death that meets criteria for MI OR
- Out-of-hospital death with a documented MI within previous 28 days
- 

**Definite Fatal CHD:**

- Does not qualify as a “definite fatal MI” AND
- Chest pain within previous 72 hours OR
- History of CHD

**Possible Fatal CHD:**

- Does not qualify as “definite fatal MI” or “definite fatal CHD” AND
- Underlying cause of death included in ICD-10 codes I20–I25, I46, I51.6, R96, or R98–R99

**2B. DHS.** Coronary death is defined as fatal coronary heart disease using criteria that comprise of definite fatal MI, definite fatal CHD, and probable fatal CHD. The criteria for definite fatal MI, definite fatal CHD, and probable fatal CHD are described below:

**Definite Fatal MI:**

- Hospitalized MI within 4 weeks of death AND
- No obvious non-ischemic cause of death

**Definite Fatal CHD:**

- Not meet criteria for fatal myocardial infarction AND
- A history of chest pain within 72 hours of death OR
- A history of ischemic heart disease including angina or myocardial infarction AND
- No obvious non-ischemic cause of death

**Probable Fatal CHD:**

- ICD 10 cause of death I20-I25, I46, I51.6 (ICD9 codes 410-414, 427.5, 429.2) with corresponding information on death certificate



### **3. Nonfatal stroke:**

**3A. MESA.** Nonfatal stroke was defined using the following criteria:

- Rapid onset of neurologic deficit, headache, or meningismus AND
- Neurologic deficits not secondary to brain trauma (closed head injury), tumor, infection (e.g., encephalitis or meningitis), or other non-vascular cause. Clinical evidence or suspicion of embolic stroke secondary to SBE (bacterial endocarditis) would be counted as stroke AND
- Clinically relevant lesion on brain imaging OR Duration greater than 24 hours OR Death within 24 hours. Clinically relevant lesion on brain imaging: Imaging finding judged to be consistent with signs and symptoms regardless of timing of brain imaging (i.e., less or greater than 24 hours), regardless of stroke type (i.e., with or without blood), and regardless of imaging technique (i.e., cranial computed tomography [CT scan] or cranial magnetic resonance imaging [MRI]).

**3B. DHS.** The criteria for nonfatal stroke in DHS was similar to MESA:

- Rapid onset of neurologic deficit, headache, or meningismus AND
- Neurologic deficits not secondary to brain trauma (closed head injury), tumor, infection (e.g., encephalitis or meningitis), or other non-vascular cause. Clinical evidence or suspicion of embolic stroke secondary to SBE (bacterial endocarditis) would be counted as stroke AND
- Clinically relevant lesion on brain imaging OR Duration greater than 24 hours OR Death within 24 hours. Clinically relevant lesion on brain imaging: Imaging finding judged to be consistent with signs and symptoms regardless of timing of brain imaging (i.e., less or greater than 24 hours), regardless of stroke type (i.e., with or without blood), and regardless of imaging technique (i.e., cranial computed tomography [CT scan] or cranial magnetic resonance imaging [MRI]).

### **4. Fatal Stroke:**

**4A. MESA.** The criteria for fatal stroke include:

- Stroke occurrence and type determined by stroke event adjudication: subarachnoid hemorrhage, intraparenchymal hemorrhage, other hemorrhage, brain infarction, other stroke type, or unknown stroke type
- Mechanism of death is recorded as due to critical brain injury or as secondary to complications such as infections (lungs, urine, skin), pulmonary embolism, or arrhythmia. Critical brain injury can be lethal either because of the size of the infarct or bleed with herniation, or because of the location in the brain stem

**4B. DHS.** The criteria for fatal stroke comprise of definite and probable fatal stroke which are defined as:

**Definite Fatal Stroke:**

- Criteria for stroke AND
- Mechanism of death recorded as due to critical brain injury or secondary to complications such as infections or pulmonary embolism

**Probable Fatal Stroke:**

- ICD 10 cause of death I60-I66, I67.2, I67.8, I69 (ICD9 codes 430-435, 437.0, 437.1) with corresponding information on death certificate

**Online Table 1A** Baseline characteristics of study participants stratified by sex

| <b>Participant Characteristics</b>           | <b>Women<br/>(n=3,826)</b> | <b>Men<br/>(n=3,216)</b> | <b>p-value</b> |
|----------------------------------------------|----------------------------|--------------------------|----------------|
| Age (years)                                  | 56.6 (12.7)                | 56.9 (12.6)              | 0.406          |
| Black race                                   | 1460 (38.2)                | 1106 (34.4)              | 0.001          |
| Hispanic race                                | 886 (23.2)                 | 762 (23.7)               | 0.596          |
| Smoking                                      | 642 (16.8)                 | 627 (19.5)               | 0.003          |
| Diabetes                                     | 393 (10.3)                 | 373 (11.6)               | 0.107          |
| Systolic blood pressure (mm Hg)              | 126.4 (21.2)               | 127.1 (18.4)             | <0.001         |
| Diastolic blood pressure (mm Hg)             | 71.2 (10.6)                | 76.2 (9.5)               | <0.001         |
| Antihypertensive use                         | 1314 (34.3)                | 982 (30.5)               | <0.001         |
| Total cholesterol (mg/dL)                    | 193.8 (37.4)               | 186.8 (36.1)             | 0.002          |
| High density lipoprotein-cholesterol (mg/dL) | 55.6 (15.2)                | 45.4 (12.1)              | <0.001         |
| Low density lipoprotein-cholesterol (mg/dL)  | 114.5 (33.6)               | 115.4 (32.8)             | 0.140          |
| Family history of myocardial infarction      | 1874 (49.0)                | 1359 (42.3)              | <0.001         |
| Statin use                                   | 476 (12.4)                 | 404 (12.6)               | 0.003          |
| Dallas Heart Study                           | 1244 (32.5)                | 960 (29.9)               | 0.016          |
| CAC score (Agatston units)                   | 0.0 [0.0-14.9]             | 4.7 [0.0-119.2]          | <0.001         |
| CAC score category                           |                            |                          | <0.001         |
| Zero                                         | 2204 (57.6)                | 1239 (38.5)              |                |
| 1 to 99 Agatston units                       | 1110 (29.0)                | 1122 (24.9)              |                |
| ≥100 Agatston units                          | 512 (13.4)                 | 855 (26.6)               |                |
| ASCVD event                                  | 238 (6.2)                  | 336 (10.5)               | <0.001         |
| CHD event                                    | 110 (2.9)                  | 223 (6.9)                | <0.001         |
| Stroke event                                 | 128 (3.4)                  | 113 (3.5)                | 0.694          |

Values shown are mean (standard deviation) or median [25<sup>th</sup>-75<sup>th</sup> percentile] and number (proportion) depending on variable type. Abbreviations – CAC = coronary artery calcium, ASCVD = atherosclerotic cardiovascular disease, CHD = coronary heart disease.

**Online Table 1B** Baseline characteristics of study participants stratified by race

| <b>Participant Characteristics</b>           | <b>White<br/>(n=2,828)</b> | <b>Black<br/>(n=2,566)</b> | <b>Hispanic<br/>(n=1,648)</b> | <b>p-value</b> |
|----------------------------------------------|----------------------------|----------------------------|-------------------------------|----------------|
| Age (years)                                  | 58.3 (12.4)                | 55.2 (12.6)                | 56.7 (12.9)                   | <0.001         |
| Women                                        | 1480 (52.3)                | 1460 (56.9)                | 886 (53.4)                    | 0.003          |
| Smoking                                      | 438 (15.5)                 | 584 (22.8)                 | 247 (15.0)                    | <0.001         |
| Diabetes                                     | 154 (5.5)                  | 371 (14.5)                 | 241 (14.6)                    | <0.001         |
| Systolic blood pressure (mm Hg)              | 124.0 (19.0)               | 130.7 (20.0)               | 125.1 (20.6)                  | <0.001         |
| Diastolic blood pressure (mm Hg)             | 72.3 (10.1)                | 76.7 (10.3)                | 72.3 (10.0)                   | <0.001         |
| Antihypertensive use                         | 821 (29.0)                 | 1011 (39.4)                | 464 (28.2)                    | <0.001         |
| Total cholesterol (mg/dL)                    | 193.2 (34.8)               | 185.6 (38.1)               | 193.8 (38.0)                  | <0.001         |
| High density lipoprotein-cholesterol (mg/dL) | 51.4 (15.5)                | 52.5 (15.0)                | 47.6 (12.6)                   | <0.001         |
| Low density lipoprotein-cholesterol (mg/dL)  | 115.9 (31.4)               | 112.8 (34.9)               | 116.7 (33.6)                  | <0.001         |
| Family history of myocardial infarction      | 1528 (54.0)                | 1073 (41.8)                | 632 (38.4)                    | <0.001         |
| Statin use                                   | 420 (14.9)                 | 295 (11.5)                 | 165 (10.0)                    | <0.001         |
| Dallas Heart Study                           | 770 (27.2)                 | 1059 (41.3)                | 375 (22.8)                    | <0.001         |
| CAC score (Agatston units)                   | 2.0 [0.0-106.5]            | 0.0 [0.0-25.2]             | 0.0 [0.0-31.3]                | <0.001         |
| CAC score category                           |                            |                            |                               | <0.001         |
| Zero                                         | 1261 (44.6)                | 1284 (50.0)                | 898 (54.5)                    |                |
| 1 to 99 Agatston units                       | 835 (29.5)                 | 906 (35.3)                 | 491 (29.8)                    |                |
| ≥100 Agatston units                          | 732 (25.9)                 | 376 (14.7)                 | 259 (15.7)                    |                |
| ASCVD event                                  | 212 (7.5)                  | 215 (8.4)                  | 147 (8.9)                     | 0.213          |
| CHD event                                    | 130 (4.6)                  | 121 (4.7)                  | 82 (5.0)                      | 0.846          |
| Stroke event                                 | 82 (2.9)                   | 94 (3.7)                   | 65 (3.9)                      | 0.125          |

Values shown are mean (standard deviation) or median [25<sup>th</sup>-75<sup>th</sup> percentile] and number (proportion) depending on variable type. Abbreviations: CAC = coronary artery calcium, ASCVD = atherosclerotic cardiovascular disease, CHD = coronary heart disease.

**Online Table 2** 10-year cumulative incidence of atherosclerotic cardiovascular disease, coronary heart disease, and stroke events in the overall study cohort along with sex and race groups across CAC score categories

| <b>CAC group</b>         | <b>Demographic group</b> | <b>ASCVD events</b> | <b>CHD events</b> | <b>Stroke events</b> |
|--------------------------|--------------------------|---------------------|-------------------|----------------------|
| <b>All CAC groups</b>    | <b>Overall cohort</b>    | 6.67 (6.09-7.30)    | 3.78 (3.35-4.27)  | 2.82 (2.45-3.25)     |
|                          | <b>Men</b>               | 8.70 (7.74-9.76)    | 5.71 (4.94-6.61)  | 2.87 (2.32-3.54)     |
|                          | <b>Women</b>             | 4.99 (4.32-5.75)    | 2.18 (1.75-2.71)  | 2.78 (2.29-3.37)     |
|                          | <b>Whites</b>            | 5.95 (5.12-6.91)    | 3.62 (2.98-4.40)  | 2.27 (1.77-2.91)     |
|                          | <b>Blacks</b>            | 7.05 (6.09-8.15)    | 3.63 (2.95-4.47)  | 3.25 (2.61-4.05)     |
|                          | <b>Hispanics</b>         | 7.36 (6.15-8.79)    | 4.31 (3.39-5.46)  | 3.12 (2.35-4.13)     |
| <b>CAC score zero</b>    | <b>Overall cohort</b>    | 2.70 (2.20-3.32)    | 1.17 (0.85-1.61)  | 1.48 (1.11-1.95)     |
|                          | <b>Men</b>               | 2.75 (1.95-3.87)    | 1.38 (0.85-2.24)  | 1.29 (0.78-2.13)     |
|                          | <b>Women</b>             | 2.68 (2.06-3.46)    | 1.05 (0.70-1.60)  | 1.58 (1.12-2.21)     |
|                          | <b>Whites</b>            | 2.03 (1.37-2.99)    | 0.89 (0.49-1.60)  | 1.06 (0.61-1.81)     |
|                          | <b>Blacks</b>            | 3.44 (2.54-4.65)    | 1.36 (0.83-2.20)  | 2.01 (1.35-2.99)     |
|                          | <b>Hispanics</b>         | 2.66 (1.76-4.01)    | 1.33 (0.74-2.40)  | 1.33 (0.74-2.39)     |
| <b>CAC score 1 to 99</b> | <b>Overall cohort</b>    | 7.04 (6.02-8.22)    | 3.59 (2.87-4.48)  | 3.39 (2.70-4.27)     |
|                          | <b>Men</b>               | 8.42 (6.90-10.27)   | 5.24 (4.04-6.77)  | 3.15 (2.25-4.40)     |
|                          | <b>Women</b>             | 5.65 (4.40-7.24)    | 1.93 (1.24-2.97)  | 3.64 (2.66-4.97)     |
|                          | <b>Whites</b>            | 6.00 (4.56-7.89)    | 3.03 (2.04-4.49)  | 2.99 (2.02-4.44)     |

|                           |                       |                     |                     |                   |
|---------------------------|-----------------------|---------------------|---------------------|-------------------|
|                           | <b>Blacks</b>         | 7.17 (5.62-9.12)    | 3.54 (2.49-5.03)    | 3.43 (2.39-4.89)  |
|                           | <b>Hispanics</b>      | 8.65 (6.39-11.65)   | 4.64 (3.05-7.04)    | 4.08 (2.58-6.40)  |
| <b>CAC score<br/>≥100</b> | <b>Overall cohort</b> | 16.52 (14.56-18.72) | 11.07 (9.44-12.98)  | 5.46 (4.31-6.90)  |
|                           | <b>Men</b>            | 18.07 (15.52-20.99) | 12.97 (10.78-15.57) | 4.96 (3.61-6.79)  |
|                           | <b>Women</b>          | 13.94 (11.10-17.45) | 7.91 (5.77-10.81)   | 6.29 (4.41-8.95)  |
|                           | <b>Whites</b>         | 13.10 (10.76-15.91) | 9.33 (7.36-11.79)   | 3.71 (2.49-5.49)  |
|                           | <b>Blacks</b>         | 19.75 (15.84-24.48) | 12.20 (9.08-16.29)  | 7.41 (5.02-10.87) |
|                           | <b>Hispanics</b>      | 21.72 (16.94-27.62) | 14.68 (10.64-20.07) | 7.74 (4.93-12.04) |

Values shown are 10-year cumulative event incidence (95% confidence interval). Abbreviations: CAC = coronary artery calcium, ASCVD = atherosclerotic cardiovascular disease, CHD = coronary heart disease.

**Online Table 3** CHD-to-stroke incidence ratio across CAC score categories and 10-year ASCVD risk groups

|                                             | <b>CAC score zero</b> | <b>CAC score 1-99</b> | <b>CAC score <math>\geq</math>100</b> |
|---------------------------------------------|-----------------------|-----------------------|---------------------------------------|
| <b>10-y ASCVD risk &lt;7.5%</b>             | 0.85 (0.43-1.45)      | 0.90 (0.48-1.50)      | 4.26 (1.56-10.47)                     |
| <b>10-y ASCVD risk 7.5-20%</b>              | 0.99 (0.49-1.61)      | 0.95 (0.60-1.42)      | 2.26 (1.38-3.48)                      |
| <b>10-y ASCVD risk <math>\geq</math>20%</b> | 0.69 (0.27-1.29)      | 1.63 (0.96-2.58)      | 1.86 (1.36-2.56)                      |

Values shown are 10-year CHD-to-stroke cumulative incidence ratio (95% Confidence Interval).

Abbreviations: CAC = coronary artery calcium, ASCVD = atherosclerotic cardiovascular disease, CHD = coronary heart disease.

**Online Table 4** Association of coronary artery calcium score with incident atherosclerotic cardiovascular disease, coronary heart disease, and stroke events in MESA and DHS cohorts

|                                        | ASCVD events     |                  | CHD events        |                  | Stroke events    |              |
|----------------------------------------|------------------|------------------|-------------------|------------------|------------------|--------------|
|                                        | HR (95%CI)       | p-value          | HR (95%CI)        | p-value          | HR (95%CI)       | p-value      |
| <b>MESA</b>                            |                  |                  |                   |                  |                  |              |
| <b>CAC score <math>\geq 100</math></b> | 2.66 (2.05-3.44) | <b>&lt;0.001</b> | 4.05 (2.81-5.83)  | <b>&lt;0.001</b> | 1.49 (1.01-2.19) | <b>0.044</b> |
| <b>CAC score 1 to 99</b>               | 1.51 (1.15-1.97) | <b>0.003</b>     | 1.87 (1.27-2.75)  | <b>0.002</b>     | 1.23 (0.84-2.19) | 0.291        |
| <b>CAC score &gt;0</b>                 | 1.98 (1.57-2.50) | <b>&lt;0.001</b> | 2.75 (1.96-3.85)  | <b>&lt;0.001</b> | 1.34 (0.96-1.88) | 0.086        |
| <b>DHS</b>                             |                  |                  |                   |                  |                  |              |
| <b>CAC score <math>\geq 100</math></b> | 3.60 (1.86-6.97) | <b>&lt;0.001</b> | 5.16 (2.13-12.49) | <b>&lt;0.001</b> | 2.19 (0.96-4.97) | 0.061        |
| <b>CAC score 1 to 99</b>               | 2.36 (1.33-4.17) | <b>0.003</b>     | 2.40 (1.08-5.34)  | <b>0.033</b>     | 1.81 (0.63-5.23) | 0.274        |
| <b>CAC score &gt;0</b>                 | 2.57 (1.47-4.49) | <b>0.001</b>     | 2.87 (1.32-6.25)  | <b>0.008</b>     | 2.13 (0.94-4.81) | 0.069        |

Referent group is participants with a zero CAC score. Cox proportional hazards regression models adjusted for age, sex, race, smoking, diabetes, systolic blood pressure, antihypertensive use, total cholesterol, high density lipoprotein-cholesterol level, family history of myocardial infarction, statin use, and educational attainment. Abbreviations: HR = hazard ratio, CI = confidence interval, ASCVD = atherosclerotic cardiovascular disease, CHD = coronary heart disease. Bold values indicate statistically significant association (two-sided p-value <0.05).



**Online Table 5** Association of coronary artery calcium score with incident atherosclerotic cardiovascular disease, coronary heart disease, and stroke events in MESA after further adjustment for educational attainment

|                                       | ASCVD events      |                  | CHD events       |                  | Stroke events    |              |
|---------------------------------------|-------------------|------------------|------------------|------------------|------------------|--------------|
|                                       | HR (95%CI)        | p-value          | HR (95%CI)       | p-value          | HR (95%CI)       | p-value      |
| <b>CAC score <math>\geq</math>100</b> | 2.63 (2.03-3.41)  | <b>&lt;0.001</b> | 3.81 (2.68-5.42) | <b>&lt;0.001</b> | 1.45 (1.00-2.12) | 0.051        |
| <b>CAC score 1 to 99</b>              | 1.51 (1.15-1.997) | <b>0.003</b>     | 1.73 (1.19-2.53) | <b>0.004</b>     | 1.21 (0.84-1.76) | 0.306        |
| <b>CAC score &gt;0</b>                | 1.98 (1.57-2.50)  | <b>&lt;0.001</b> | 2.59 (1.87-3.59) | <b>&lt;0.001</b> | 1.32 (1.05-1.83) | <b>0.047</b> |

Referent group is participants with a zero CAC score. Cox proportional hazards regression models adjusted for age, sex, race, smoking, diabetes, systolic blood pressure, antihypertensive use, total cholesterol, high density lipoprotein-cholesterol level, family history of myocardial infarction, statin use, and educational attainment. Abbreviations: HR = hazard ratio, CI = confidence interval, ASCVD = atherosclerotic cardiovascular disease, CHD = coronary heart disease. Bold values indicate statistically significant association (two-sided p-value <0.05).

**Online Table 6** Association of coronary artery calcium score with incident atherosclerotic cardiovascular disease, coronary heart disease, and stroke events assessed using Fine and Gray competing risk regression models

|                          | Group            | ASCVD events     |                  | CHD events        |                  | Stroke events      |              |
|--------------------------|------------------|------------------|------------------|-------------------|------------------|--------------------|--------------|
|                          |                  | sHR (95%CI)      | p-value          | sHR (95%CI)       | p-value          | sHR (95%CI)        | P-value      |
| <b>CAC score &gt;0</b>   | <b>Overall</b>   | 2.01 (1.63-2.47) | <b>&lt;0.001</b> | 2.67 (1.98-3.59)  | <b>&lt;0.001</b> | 1.42 (1.05-1.93)   | <b>0.023</b> |
|                          | <b>Men</b>       | 2.54 (1.86-3.45) | <b>&lt;0.001</b> | 3.56 (2.30-5.51)  | <b>&lt;0.001</b> | 1.48 (0.93-2.34)   | 0.096        |
|                          | <b>Women</b>     | 1.63 (1.12-2.20) | <b>0.001</b>     | 1.93 (1.24-3.00)  | <b>0.004</b>     | 1.40 (0.94-2.10)   | 0.101        |
|                          | <b>Whites</b>    | 2.25 (1.52-3.31) | <b>&lt;0.001</b> | 3.52 (2.01-6.15)  | <b>&lt;0.001</b> | 1.32 (0.76-2.30)   | 0.327        |
|                          | <b>Blacks</b>    | 1.80 (1.32-2.46) | <b>&lt;0.001</b> | 2.25 (1.45-3.48)  | <b>&lt;0.001</b> | 1.36 (0.86-2.15)   | 0.195        |
|                          | <b>Hispanics</b> | 1.97 (1.30-3.00) | <b>0.002</b>     | 2.40 (1.28-4.50)  | <b>0.006</b>     | 1.55 (0.84-2.86)   | 0.163        |
| <b>CAC score 1 to 99</b> | <b>Overall</b>   | 1.63 (1.30-2.05) | <b>&lt;0.001</b> | 1.92 (1.38-2.67)  | <b>&lt;0.001</b> | 1.40 (1.01-1.93)   | <b>0.043</b> |
|                          | <b>Men</b>       | 2.04 (1.46-2.84) | <b>&lt;0.001</b> | 2.67 (1.68-4.25)  | <b>&lt;0.001</b> | 1.42 (0.87-2.32)   | 0.157        |
|                          | <b>Women</b>     | 1.34 (0.96-1.89) | 0.087            | 1.24 (0.72-2.12)  | 0.442            | 1.41 (0.91-2.16)   | 0.123        |
|                          | <b>Whites</b>    | 1.91 (1.25-2.91) | <b>0.002</b>     | 2.31 (1.23-4.33)  | <b>0.009</b>     | 1.61 (0.92-2.84)   | 0.099        |
|                          | <b>Blacks</b>    | 1.31 (0.92-1.85) | 0.130            | 1.54 (0.95-2.51)  | 0.082            | 1.10 (0.66-1.81)   | 0.725        |
|                          | <b>Hispanics</b> | 1.79 (1.14-2.81) | <b>0.012</b>     | 2.05 (1.05-4.00)  | <b>0.035</b>     | 1.56 (0.82-2.98)   | 0.180        |
| <b>CAC score ≥100</b>    | <b>Overall</b>   | 2.66 (2.08-3.40) | <b>&lt;0.001</b> | 4.02 (2.86-5.65)  | <b>&lt;0.001</b> | 1.46 (1.003-2.134) | <b>0.048</b> |
|                          | <b>Men</b>       | 3.32 (2.35-4.69) | <b>&lt;0.001</b> | 5.02 (3.12-8.08)  | <b>&lt;0.001</b> | 1.55 (0.90-2.68)   | 0.118        |
|                          | <b>Women</b>     | 2.18 (1.51-3.14) | <b>&lt;0.001</b> | 3.39 (1.99-5.78)  | <b>&lt;0.001</b> | 1.40 (0.84-2.34)   | 0.199        |
|                          | <b>Whites</b>    | 2.72 (1.74-4.25) | <b>&lt;0.001</b> | 5.56 (2.98-10.39) | <b>&lt;0.001</b> | 1.02 (0.53-1.95)   | 0.963        |
|                          | <b>Blacks</b>    | 2.90 (1.99-4.23) | <b>&lt;0.001</b> | 3.78 (2.26-6.34)  | <b>&lt;0.001</b> | 1.93 (1.08-3.44)   | <b>0.027</b> |
|                          | <b>Hispanics</b> | 2.31 (1.41-3.81) | <b>0.001</b>     | 3.05 (1.48-6.30)  | <b>0.003</b>     | 1.53 (0.72-3.22)   | 0.268        |

Referent group is participants with zero CAC score. Fine and Gray competing risk regression models adjusted for age, sex, race, smoking, diabetes, systolic blood pressure, antihypertensive use, total cholesterol, high density lipoprotein-cholesterol level, family history of myocardial infarction, and statin use. The competing event in ASCVD models was non-cardiovascular death, in CHD models was non-CHD death or stroke event, and in stroke models was non-stroke death or CHD event. Abbreviations: sHR = sub-distribution hazard ratio, CI = confidence interval, ASCVD = atherosclerotic cardiovascular disease, CHD = coronary heart disease. Bold values indicate statistically significant association (two-sided p-value <0.05).

**Online Table 7** Association of coronary artery calcium score with incident atherosclerotic cardiovascular disease, coronary heart disease, and stroke events among participants that qualify for coronary artery calcium scanning as per 2018 cholesterol guidelines (N=1,252)

|                          | Group            | ASCVD events     |                  | CHD events        |                  | Stroke events    |         |
|--------------------------|------------------|------------------|------------------|-------------------|------------------|------------------|---------|
|                          |                  | HR (95%CI)       | p-value          | HR (95%CI)        | p-value          | HR (95%CI)       | p-value |
| <b>CAC score &gt;0</b>   | <b>Overall</b>   | 1.91 (1.26-2.89) | <b>0.002</b>     | 2.69 (1.47-4.94)  | <b>0.001</b>     | 1.24 (0.69-2.25) | 0.472   |
|                          | <b>Men</b>       | 2.29 (1.29-4.07) | <b>0.005</b>     | 4.16 (1.72-10.1)  | <b>0.002</b>     | 1.08 (0.48-2.42) | 0.854   |
|                          | <b>Women</b>     | 1.65 (0.86-3.20) | 0.135            | 1.58 (0.61-4.12)  | 0.346            | 1.60 (0.64-3.99) | 0.316   |
|                          | <b>Whites</b>    | 2.27 (1.04-4.94) | <b>0.039</b>     | 4.06 (1.21-13.64) | <b>0.024</b>     | 1.08 (0.37-3.20) | 0.887   |
|                          | <b>Blacks</b>    | 2.30 (1.15-4.59) | <b>0.019</b>     | 2.44 (0.94-6.34)  | 0.067            | 1.99 (0.71-5.60) | 0.189   |
|                          | <b>Hispanics</b> | 1.36 (0.64-2.88) | 0.429            | 2.20 (0.68-7.05)  | 0.186            | 0.82 (0.28-2.37) | 0.702   |
| <b>CAC score 1 to 99</b> | <b>Overall</b>   | 1.55 (0.97-2.47) | 0.068            | 2.02 (1.02-3.97)  | <b>0.043</b>     | 1.15 (0.59-2.23) | 0.680   |
|                          | <b>Men</b>       | 1.91 (1.01-3.61) | <b>&lt;0.001</b> | 3.27 (1.26-8.46)  | <b>0.015</b>     | 1.03 (0.42-2.55) | 0.944   |
|                          | <b>Women</b>     | 1.28 (0.60-2.70) | 0.526            | 1.00 (0.32-3.16)  | 0.993            | 1.47 (0.54-3.96) | 0.452   |
|                          | <b>Whites</b>    | 1.79 (0.74-4.34) | 0.195            | 2.96 (0.78-11.22) | 0.111            | 1.04 (0.30-3.58) | 0.949   |
|                          | <b>Blacks</b>    | 1.73 (0.80-3.75) | 0.165            | 1.68 (0.57-4.98)  | 0.350            | 1.67 (0.54-5.18) | 0.373   |
|                          | <b>Hispanics</b> | 1.53 (0.67-3.53) | 0.314            | 2.21 (0.62-7.91)  | 0.223            | 0.99 (0.31-3.19) | 0.984   |
| <b>CAC score ≥100</b>    | <b>Overall</b>   | 2.42 (1.52-3.84) | <b>&lt;0.001</b> | 3.64 (1.89-7.00)  | <b>&lt;0.001</b> | 1.37 (0.69-2.73) | 0.368   |
|                          | <b>Men</b>       | 2.76 (1.48-5.15) | <b>0.001</b>     | 5.25 (2.08-13.30) | <b>&lt;0.001</b> | 1.14 (0.45-2.87) | 0.789   |
|                          | <b>Women</b>     | 2.50 (1.15-5.47) | <b>0.022</b>     | 2.93 (0.95-8.97)  | 0.060            | 1.87 (0.61-5.71) | 0.273   |
|                          | <b>Whites</b>    | 2.66 (1.18-6.00) | <b>0.018</b>     | 4.95 (1.43-17.18) | <b>0.012</b>     | 1.12 (0.34-3.63) | 0.855   |
|                          | <b>Blacks</b>    | 3.30 (1.53-7.13) | <b>0.002</b>     | 3.76 (1.32-10.70) | <b>0.013</b>     | 2.55 (0.80-8.11) | 0.114   |
|                          | <b>Hispanics</b> | 1.13 (0.43-2.96) | 0.811            | 2.18 (0.53-8.46)  | 0.261            | 0.56 (0.11-2.77) | 0.477   |

Referent group is participants with a zero CAC score. Cox proportional hazards regression models adjusted for age, sex, race, smoking, diabetes, systolic blood pressure, antihypertensive use, total cholesterol, high density lipoprotein-cholesterol level, and family history of myocardial infarction.

**Online Table 8A** Cardiovascular risk reclassification in the overall cohort after adding CAC score categories to a baseline risk prediction model

| <b>ASCVD Events</b>          | <b>Event</b>                |       |       | <b>No Event</b>             |       |       |
|------------------------------|-----------------------------|-------|-------|-----------------------------|-------|-------|
|                              | <b>Baseline Model + CAC</b> |       |       | <b>Baseline Model + CAC</b> |       |       |
| <b>Baseline Model</b>        | <7.5%                       | ≥7.5% | Total | <7.5%                       | ≥7.5% | Total |
| <7.5%                        | 138                         | 53    | 191   | 4308                        | 319   | 4627  |
| ≥7.5%                        | 33                          | 350   | 383   | 429                         | 1412  | 1841  |
| Total                        | 171                         | 403   | 574   | 4737                        | 1731  | 6468  |
| <b>Net Effect of CAC</b>     |                             |       |       |                             |       |       |
| Increased Risk               | 53                          |       |       | 319                         |       |       |
| Decreased Risk               | 33                          |       |       | 429                         |       |       |
| Net Correctly Reclassified   | 0.035 (p=0.031)             |       |       | 0.017 (p<0.001)             |       |       |
| <b>NRI = 0.052 (p=0.002)</b> |                             |       |       |                             |       |       |

| <b>CHD Events</b>               | <b>Event</b>                |       |       | <b>No Event</b>             |       |       |
|---------------------------------|-----------------------------|-------|-------|-----------------------------|-------|-------|
|                                 | <b>Baseline Model + CAC</b> |       |       | <b>Baseline Model + CAC</b> |       |       |
| <b>Baseline Model</b>           | <7.5%                       | ≥7.5% | Total | <7.5%                       | ≥7.5% | Total |
| <7.5%                           | 134                         | 65    | 199   | 5510                        | 323   | 5833  |
| ≥7.5%                           | 20                          | 114   | 134   | 274                         | 596   | 870   |
| Total                           | 154                         | 179   | 333   | 5784                        | 919   | 6703  |
| <b>Net Effect of CAC</b>        |                             |       |       |                             |       |       |
| Increased Risk                  | 65                          |       |       | 323                         |       |       |
| Decreased Risk                  | 20                          |       |       | 274                         |       |       |
| Net Correctly Reclassified      | 0.135 (p<0.001)             |       |       | -0.007 (p=0.045)            |       |       |
| <b>NRI = 0.128 (p&lt;0.001)</b> |                             |       |       |                             |       |       |

| Stroke Events                | Event                |       |       | No Event             |       |       |
|------------------------------|----------------------|-------|-------|----------------------|-------|-------|
|                              | Baseline Model + CAC |       |       | Baseline Model + CAC |       |       |
| Baseline Model               | <7.5%                | ≥7.5% | Total | <7.5%                | ≥7.5% | Total |
| <7.5%                        | 188                  | 12    | 200   | 6309                 | 79    | 6388  |
| ≥7.5%                        | 5                    | 36    | 41    | 64                   | 342   | 406   |
| Total                        | 193                  | 48    | 241   | 6373                 | 421   | 6794  |
| Net Effect of CAC            |                      |       |       |                      |       |       |
| Increased Risk               | 12                   |       |       | 79                   |       |       |
| Decreased Risk               | 5                    |       |       | 64                   |       |       |
| Net Correctly Reclassified   | 0.029 (p=0.090)      |       |       | -0.002 (p=0.210)     |       |       |
| <b>NRI = 0.027 (p=0.119)</b> |                      |       |       |                      |       |       |

Baseline 10-year risk prediction models comprised of age, sex, race, diabetes, smoking, systolic blood pressure, antihypertensive use, total cholesterol, HDL-C level, family history, and statin use at baseline. Abbreviations: ASCVD = atherosclerotic cardiovascular disease, CAC = coronary artery calcium, NRI = net reclassification index

**Online Table 8B** Cardiovascular risk reclassification in men after adding CAC score categories to a baseline risk prediction model

| ASCVD Events               | Event                |       |       | No Event             |       |       |
|----------------------------|----------------------|-------|-------|----------------------|-------|-------|
|                            | Baseline Model + CAC |       |       | Baseline Model + CAC |       |       |
| Baseline Model             | <7.5%                | ≥7.5% | Total | <7.5%                | ≥7.5% | Total |
| <7.5%                      | 47                   | 23    | 70    | 1553                 | 197   | 1750  |
| ≥7.5%                      | 24                   | 242   | 266   | 262                  | 868   | 1130  |
| Total                      | 71                   | 265   | 336   | 1815                 | 1065  | 2880  |
| <b>Net Effect of CAC</b>   |                      |       |       |                      |       |       |
| Increased Risk             | 23                   |       |       | 197                  |       |       |
| Decreased Risk             | 24                   |       |       | 262                  |       |       |
| Net Correctly Reclassified | -0.003 (p=0.884)     |       |       | 0.023 (p=0.002)      |       |       |
| NRI = 0.020 (p=0.367)      |                      |       |       |                      |       |       |

| CHD Events                 | Event                |       |       | No Event             |       |       |
|----------------------------|----------------------|-------|-------|----------------------|-------|-------|
|                            | Baseline Model + CAC |       |       | Baseline Model + CAC |       |       |
| Baseline Model             | <7.5%                | ≥7.5% | Total | <7.5%                | ≥7.5% | Total |
| <7.5%                      | 60                   | 46    | 106   | 2043                 | 199   | 2242  |
| ≥7.5%                      | 12                   | 105   | 117   | 205                  | 543   | 748   |
| Total                      | 72                   | 151   | 223   | 2248                 | 742   | 2990  |
| <b>Net Effect of CAC</b>   |                      |       |       |                      |       |       |
| Increased Risk             | 46                   |       |       | 199                  |       |       |
| Decreased Risk             | 12                   |       |       | 205                  |       |       |
| Net Correctly Reclassified | 0.153 (p<0.001)      |       |       | 0.002 (p=0.765)      |       |       |
| NRI = 0.154 (<0.001)       |                      |       |       |                      |       |       |

| Stroke Events                | Event                |       |       | No Event             |       |       |
|------------------------------|----------------------|-------|-------|----------------------|-------|-------|
|                              | Baseline Model + CAC |       |       | Baseline Model + CAC |       |       |
| Baseline Model               | <7.5%                | ≥7.5% | Total | <7.5%                | ≥7.5% | Total |
| <7.5%                        | 92                   | 4     | 96    | 2887                 | 34    | 2921  |
| ≥7.5%                        | 2                    | 15    | 17    | 20                   | 157   | 177   |
| Total                        | 94                   | 19    | 113   | 2907                 | 191   | 3098  |
| Net Effect of CAC            |                      |       |       |                      |       |       |
| Increased Risk               | 4                    |       |       | 34                   |       |       |
| Decreased Risk               | 2                    |       |       | 20                   |       |       |
| Net Correctly Reclassified   | 0.018 (p=0.414)      |       |       | -0.005 (p=0.057)     |       |       |
| <b>NRI = 0.013 (p=0.546)</b> |                      |       |       |                      |       |       |

Baseline 10-year risk prediction models comprised of age, sex, race, diabetes, smoking, systolic blood pressure, antihypertensive use, total cholesterol, HDL-C level, family history, and statin use at baseline. Abbreviations: ASCVD = atherosclerotic cardiovascular disease, CAC = coronary artery calcium, NRI = net reclassification index

**Online Table 8C** Cardiovascular risk reclassification in women after adding CAC score categories to a baseline risk prediction model

| ASCVD Events               | Event                |       |       | No Event             |       |       |
|----------------------------|----------------------|-------|-------|----------------------|-------|-------|
|                            | Baseline Model + CAC |       |       | Baseline Model + CAC |       |       |
| Baseline Model             | <7.5%                | ≥7.5% | Total | <7.5%                | ≥7.5% | Total |
| <7.5%                      | 89                   | 17    | 106   | 2778                 | 106   | 2884  |
| ≥7.5%                      | 14                   | 118   | 132   | 168                  | 536   | 704   |
| Total                      | 103                  | 135   | 238   | 2946                 | 642   | 3588  |
| <b>Net Effect of CAC</b>   |                      |       |       |                      |       |       |
| Increased Risk             | 17                   |       |       | 106                  |       |       |
| Decreased Risk             | 14                   |       |       | 168                  |       |       |
| Net Correctly Reclassified | 0.013 (p=0.590)      |       |       | 0.017 (p<0.001)      |       |       |
| NRI = 0.030 (p=0.210)      |                      |       |       |                      |       |       |

| CHD Events                 | Event                |       |       | No Event             |       |       |
|----------------------------|----------------------|-------|-------|----------------------|-------|-------|
|                            | Baseline Model + CAC |       |       | Baseline Model + CAC |       |       |
| Baseline Model             | <7.5%                | ≥7.5% | Total | <7.5%                | ≥7.5% | Total |
| <7.5%                      | 76                   | 21    | 97    | 3432                 | 113   | 3545  |
| ≥7.5%                      | 1                    | 12    | 13    | 70                   | 98    | 168   |
| Total                      | 77                   | 33    | 110   | 3502                 | 211   | 3713  |
| <b>Net Effect of CAC</b>   |                      |       |       |                      |       |       |
| Increased Risk             | 21                   |       |       | 113                  |       |       |
| Decreased Risk             | 1                    |       |       | 70                   |       |       |
| Net Correctly Reclassified | 0.182 (p<0.001)      |       |       | -0.012 (p=0.001)     |       |       |
| NRI = 0.170 (p<0.001)      |                      |       |       |                      |       |       |



| Stroke Events                | Event                |       |       | No Event             |       |       |
|------------------------------|----------------------|-------|-------|----------------------|-------|-------|
|                              | Baseline Model + CAC |       |       | Baseline Model + CAC |       |       |
| Baseline Model               | <7.5%                | ≥7.5% | Total | <7.5%                | ≥7.5% | Total |
| <7.5%                        | 87                   | 5     | 92    | 3379                 | 61    | 3440  |
| ≥7.5%                        | 4                    | 32    | 36    | 47                   | 209   | 256   |
| Total                        | 91                   | 37    | 128   | 3426                 | 270   | 3696  |
| Net Effect of CAC            |                      |       |       |                      |       |       |
| Increased Risk               | 5                    |       |       | 61                   |       |       |
| Decreased Risk               | 4                    |       |       | 47                   |       |       |
| Net Correctly Reclassified   | 0.008 (p=0.739)      |       |       | -0.004 (p=0.178)     |       |       |
| <b>NRI = 0.004 (p=0.845)</b> |                      |       |       |                      |       |       |

Baseline 10-year risk prediction models comprised of age, sex, race, diabetes, smoking, systolic blood pressure, antihypertensive use, total cholesterol, HDL-C level, family history, and statin use at baseline. Abbreviations: ASCVD = atherosclerotic cardiovascular disease, CAC = coronary artery calcium, NRI = net reclassification index

**Online Table 8D** Cardiovascular risk reclassification in Whites after adding CAC score categories to a baseline risk prediction model

| ASCVD Events                 | Event                |       |       | No Event             |       |       |
|------------------------------|----------------------|-------|-------|----------------------|-------|-------|
|                              | Baseline Model + CAC |       |       | Baseline Model + CAC |       |       |
| Baseline Model               | <7.5%                | ≥7.5% | Total | <7.5%                | ≥7.5% | Total |
| <7.5%                        | 60                   | 22    | 82    | 1830                 | 120   | 1950  |
| ≥7.5%                        | 5                    | 125   | 130   | 113                  | 553   | 666   |
| Total                        | 65                   | 147   | 212   | 1943                 | 553   | 2616  |
| <b>Net Effect of CAC</b>     |                      |       |       |                      |       |       |
| Increased Risk               | 22                   |       |       | 120                  |       |       |
| Decreased Risk               | 5                    |       |       | 113                  |       |       |
| Net Correctly Reclassified   | 0.080 (p=0.001)      |       |       | -0.003 (p=0.647)     |       |       |
| <b>NRI = 0.078 (p=0.002)</b> |                      |       |       |                      |       |       |

| CHD Events                   | Event                |       |       | No Event             |       |       |
|------------------------------|----------------------|-------|-------|----------------------|-------|-------|
|                              | Baseline Model + CAC |       |       | Baseline Model + CAC |       |       |
| Baseline Model               | <7.5%                | ≥7.5% | Total | <7.5%                | ≥7.5% | Total |
| <7.5%                        | 47                   | 35    | 82    | 2199                 | 164   | 2363  |
| ≥7.5%                        | 10                   | 38    | 48    | 96                   | 238   | 334   |
| Total                        | 57                   | 73    | 130   | 2295                 | 402   | 2697  |
| <b>Net Effect of CAC</b>     |                      |       |       |                      |       |       |
| Increased Risk               | 35                   |       |       | 164                  |       |       |
| Decreased Risk               | 10                   |       |       | 96                   |       |       |
| Net Correctly Reclassified   | 0.192 (p<0.001)      |       |       | -0.025 (p<0.001)     |       |       |
| <b>NRI = 0.167 (p=0.001)</b> |                      |       |       |                      |       |       |

| Stroke Events                 | Event                |       |       | No Event             |       |       |
|-------------------------------|----------------------|-------|-------|----------------------|-------|-------|
|                               | Baseline Model + CAC |       |       | Baseline Model + CAC |       |       |
| Baseline Model                | <7.5%                | ≥7.5% | Total | <7.5%                | ≥7.5% | Total |
| <7.5%                         | 63                   | 2     | 65    | 2589                 | 30    | 2619  |
| ≥7.5%                         | 3                    | 14    | 17    | 27                   | 99    | 126   |
| Total                         | 66                   | 16    | 82    | 2616                 | 129   | 2745  |
| Net Effect of CAC             |                      |       |       |                      |       |       |
| Increased Risk                | 2                    |       |       | 30                   |       |       |
| Decreased Risk                | 3                    |       |       | 27                   |       |       |
| Net Correctly Reclassified    | -0.012 (p=0.655)     |       |       | -0.001 (p=0.691)     |       |       |
| <b>NRI = -0.013 (p=0.628)</b> |                      |       |       |                      |       |       |

Baseline 10-year risk prediction models comprised of age, sex, race, diabetes, smoking, systolic blood pressure, antihypertensive use, total cholesterol, HDL-C level, family history, and statin use at baseline. Abbreviations: ASCVD = atherosclerotic cardiovascular disease, CAC = coronary artery calcium, NRI = net reclassification index

**Online Table 8E** Cardiovascular risk reclassification in Blacks after adding CAC score categories to a baseline risk prediction model

| ASCVD Events                 | Event                |       |       | No Event             |       |       |
|------------------------------|----------------------|-------|-------|----------------------|-------|-------|
|                              | Baseline Model + CAC |       |       | Baseline Model + CAC |       |       |
| Baseline Model               | <7.5%                | ≥7.5% | Total | <7.5%                | ≥7.5% | Total |
| <7.5%                        | 52                   | 19    | 71    | 1532                 | 97    | 1629  |
| ≥7.5%                        | 16                   | 128   | 144   | 209                  | 513   | 722   |
| Total                        | 68                   | 147   | 215   | 1741                 | 610   | 2351  |
| <b>Net Effect of CAC</b>     |                      |       |       |                      |       |       |
| Increased Risk               | 19                   |       |       | 97                   |       |       |
| Decreased Risk               | 16                   |       |       | 209                  |       |       |
| Net Correctly Reclassified   | 0.014 (p=0.612)      |       |       | 0.048 (p<0.001)      |       |       |
| <b>NRI = 0.062 (p=0.031)</b> |                      |       |       |                      |       |       |

| CHD Events                   | Event                |       |       | No Event             |       |       |
|------------------------------|----------------------|-------|-------|----------------------|-------|-------|
|                              | Baseline Model + CAC |       |       | Baseline Model + CAC |       |       |
| Baseline Model               | <7.5%                | ≥7.5% | Total | <7.5%                | ≥7.5% | Total |
| <7.5%                        | 57                   | 20    | 77    | 2038                 | 122   | 2160  |
| ≥7.5%                        | 9                    | 35    | 44    | 130                  | 151   | 281   |
| Total                        | 66                   | 55    | 121   | 2168                 | 273   | 2441  |
| <b>Net Effect of CAC</b>     |                      |       |       |                      |       |       |
| Increased Risk               | 20                   |       |       | 122                  |       |       |
| Decreased Risk               | 9                    |       |       | 130                  |       |       |
| Net Correctly Reclassified   | 0.091 (p=0.041)      |       |       | 0.003 (p=0.614)      |       |       |
| <b>NRI = 0.094 (p=0.036)</b> |                      |       |       |                      |       |       |

| Stroke Events                | Event                |       |       | No Event             |       |       |
|------------------------------|----------------------|-------|-------|----------------------|-------|-------|
|                              | Baseline Model + CAC |       |       | Baseline Model + CAC |       |       |
| Baseline Model               | <7.5%                | ≥7.5% | Total | <7.5%                | ≥7.5% | Total |
| <7.5%                        | 74                   | 7     | 81    | 2237                 | 78    | 2315  |
| ≥7.5%                        | 5                    | 8     | 13    | 50                   | 101   | 151   |
| Total                        | 79                   | 15    | 94    | 2287                 | 179   | 2466  |
| Net Effect of CAC            |                      |       |       |                      |       |       |
| Increased Risk               | 7                    |       |       | 78                   |       |       |
| Decreased Risk               | 5                    |       |       | 50                   |       |       |
| Net Correctly Reclassified   | 0.021 (p=0.564)      |       |       | -0.011 (p=0.013)     |       |       |
| <b>NRI = 0.010 (p=0.789)</b> |                      |       |       |                      |       |       |

Baseline 10-year risk prediction models comprised of age, sex, race, diabetes, smoking, systolic blood pressure, antihypertensive use, total cholesterol, HDL-C level, family history, and statin use at baseline. Abbreviations: ASCVD = atherosclerotic cardiovascular disease, CAC = coronary artery calcium, NRI = net reclassification index

**Online Table 8F** Cardiovascular risk reclassification in Hispanics after adding CAC score categories to a baseline risk prediction model

| <b>ASCVD Events</b>           | <b>Event</b>                |       |       | <b>No Event</b>             |       |       |
|-------------------------------|-----------------------------|-------|-------|-----------------------------|-------|-------|
|                               | <b>Baseline Model + CAC</b> |       |       | <b>Baseline Model + CAC</b> |       |       |
| <b>Baseline Model</b>         | <7.5%                       | ≥7.5% | Total | <7.5%                       | ≥7.5% | Total |
| <7.5%                         | 31                          | 4     | 35    | 1002                        | 63    | 1065  |
| ≥7.5%                         | 7                           | 105   | 112   | 83                          | 353   | 436   |
| Total                         | 38                          | 109   | 147   | 1085                        | 416   | 1501  |
| <b>Net Effect of CAC</b>      |                             |       |       |                             |       |       |
| Increased Risk                | 4                           |       |       | 63                          |       |       |
| Decreased Risk                | 7                           |       |       | 83                          |       |       |
| Net Correctly Reclassified    | -0.020 (p=0.366)            |       |       | 0.013 (p=0.098)             |       |       |
| <b>NRI = -0.007 (p=0.768)</b> |                             |       |       |                             |       |       |

| <b>CHD Events</b>            | <b>Event</b>                |       |       | <b>No Event</b>             |       |       |
|------------------------------|-----------------------------|-------|-------|-----------------------------|-------|-------|
|                              | <b>Baseline Model + CAC</b> |       |       | <b>Baseline Model + CAC</b> |       |       |
| <b>Baseline Model</b>        | <7.5%                       | ≥7.5% | Total | <7.5%                       | ≥7.5% | Total |
| <7.5%                        | 31                          | 6     | 37    | 1253                        | 60    | 1313  |
| ≥7.5%                        | 3                           | 42    | 45    | 48                          | 204   | 252   |
| Total                        | 34                          | 48    | 82    | 1301                        | 264   | 1565  |
| <b>Net Effect of CAC</b>     |                             |       |       |                             |       |       |
| Increased Risk               | 6                           |       |       | 60                          |       |       |
| Decreased Risk               | 3                           |       |       | 48                          |       |       |
| Net Correctly Reclassified   | 0.037 (p=0.317)             |       |       | -0.008 (p=0.248)            |       |       |
| <b>NRI = 0.029 (p=0.437)</b> |                             |       |       |                             |       |       |

| Stroke Events                | Event                |       |       | No Event             |       |       |
|------------------------------|----------------------|-------|-------|----------------------|-------|-------|
|                              | Baseline Model + CAC |       |       | Baseline Model + CAC |       |       |
| Baseline Model               | <7.5%                | ≥7.5% | Total | <7.5%                | ≥7.5% | Total |
| <7.5%                        | 36                   | 4     | 40    | 1421                 | 29    | 1450  |
| ≥7.5%                        | 1                    | 24    | 25    | 15                   | 118   | 133   |
| Total                        | 37                   | 28    | 65    | 1436                 | 147   | 1583  |
| Net Effect of CAC            |                      |       |       |                      |       |       |
| Increased Risk               | 4                    |       |       | 29                   |       |       |
| Decreased Risk               | 1                    |       |       | 15                   |       |       |
| Net Correctly Reclassified   | 0.046 (p=0.180)      |       |       | -0.009 (p=0.035)     |       |       |
| <b>NRI = 0.037 (p=0.282)</b> |                      |       |       |                      |       |       |

Baseline 10-year risk prediction models comprised of age, sex, race, diabetes, smoking, systolic blood pressure, antihypertensive use, total cholesterol, HDL-C level, family history, and statin use at baseline. Abbreviations: ASCVD = atherosclerotic cardiovascular disease, CAC = coronary artery calcium, NRI = net reclassification index

## REFERENCES

1. Victor RG, Haley RW, Willett DL, Peshock RM, Vaeth PC, Leonard D, Basit M, Cooper RS, Iannacchione VG, Visscher WA, Staab JM, Hobbs HH, Dallas Heart Study I. The Dallas Heart Study: a population-based probability sample for the multidisciplinary study of ethnic differences in cardiovascular health. *Am J Cardiol.* 2004;93(12):1473-80.
2. Bild DE, Bluemke DA, Burke GL, Detrano R, Diez Roux AV, Folsom AR, Greenland P, Jacob DR, Jr., Kronmal R, Liu K, Nelson JC, O'Leary D, Saad MF, Shea S, Szklo M, Tracy RP. Multi-Ethnic Study of Atherosclerosis: objectives and design. *Am J Epidemiol.* 2002;156(9):871-81.
3. Paixao AR, Ayers CR, El Sabbagh A, Sanghavi M, Berry JD, Rohatgi A, Kumbhani DJ, McGuire DK, Das SR, de Lemos JA, Khera A. Coronary Artery Calcium Improves Risk Classification in Younger Populations. *JACC Cardiovasc Imaging.* 2015;8(11):1285-93.
4. Nasir K, Budoff MJ, Wong ND, Scheuner M, Herrington D, Arnett DK, Szklo M, Greenland P, Blumenthal RS. Family history of premature coronary heart disease and coronary artery calcification: Multi-Ethnic Study of Atherosclerosis (MESA). *Circulation.* 2007;116(6):619-26.
5. Paixao AR, Berry JD, Neeland IJ, Ayers CR, Rohatgi A, de Lemos JA, Khera A. Coronary artery calcification and family history of myocardial infarction in the Dallas heart study. *JACC Cardiovasc Imaging.* 2014;7(7):679-86.
6. Carr JJ, Nelson JC, Wong ND, McNitt-Gray M, Arad Y, Jacobs DR, Jr., Sidney S, Bild DE, Williams OD, Detrano RC. Calcified coronary artery plaque measurement with cardiac CT in population-based studies: standardized protocol of Multi-Ethnic Study of Atherosclerosis (MESA) and Coronary Artery Risk Development in Young Adults (CARDIA) study. *Radiology.* 2005;234(1):35-43.
7. Jain T, Peshock R, McGuire DK, Willett D, Yu Z, Vega GL, Guerra R, Hobbs HH, Grundy SM, Dallas Heart Study I. African Americans and Caucasians have a similar prevalence of coronary calcium in the Dallas Heart Study. *J Am Coll Cardiol.* 2004;44(5):1011-7.
8. Daniell AL, Wong ND, Friedman JD, Ben-Yosef N, Miranda-Peats R, Hayes SW, Kang X, Sciammarella MG, de Yang L, Germano G, Berman DS. Concordance of coronary artery calcium estimates between MDCT and electron beam tomography. *AJR Am J Roentgenol.* 2005;185(6):1542-5.
